# Supplementary material for: The impact of precursor water content on solution-processed organometal halide perovskite films and solar cells
Source: Royal Society of Chemistry journal article supplement (doi:10.1039/c5ta06199g), 2015-01-01
Supplement: c5ta06199g1.pdf [file c5ta06199g1.pdf]

**Supplementary information for:**

**The impact of precursor water content on solution-processed organometal halide perovskite films and solar cells**

Bert Conings<sup>1</sup>, Aslihan Babayigit<sup>1</sup>, Tim Vangerven<sup>1</sup>, Jan D'Haen<sup>1</sup>, Jean Manca<sup>2</sup> and Hans-Gerd Boyen<sup>1</sup>

<sup>1</sup> *Hasselt University, Institute for Materials Research, Wetenschapspark 1, Diepenbeek, 3590, Belgium*

<sup>2</sup> *Hasselt University, X-LaB, Agoralaan Building D, Diepenbeek, 3590, Belgium*

bert.conings@uhasselt.be

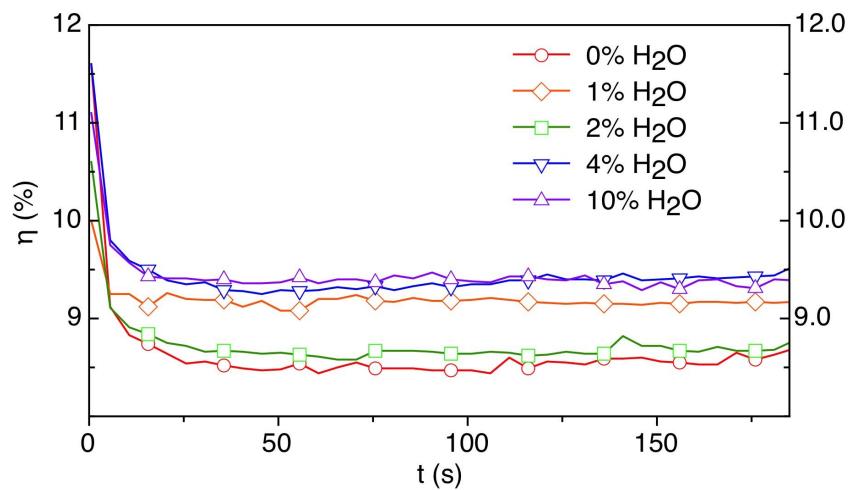

Figure S1: Stabilized power conversion efficiency for representative solar cells with perovskite layers prepared from precursors with different water content.

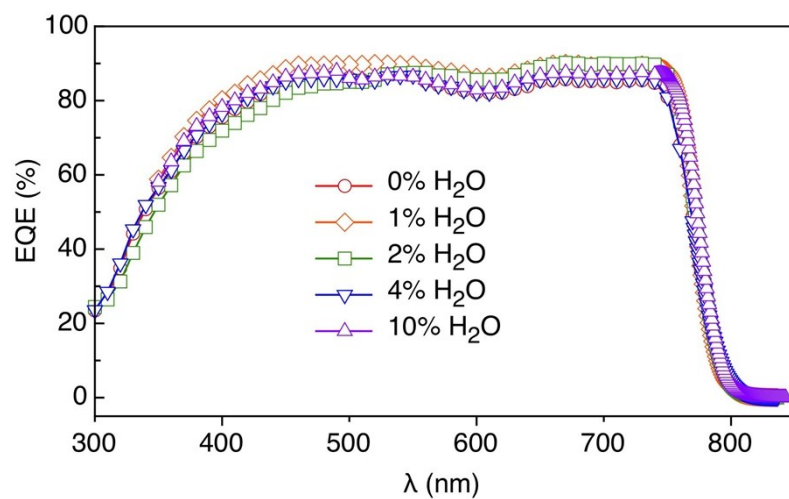

Figure S2: External quantum efficiency measurements for representative solar cells with perovskite layers prepared from precursors with different water content.
